# Supplementary material for: Fate and freedom in developing neocortical circuits
Source: PubMed Central journal article supplement (PMC5500875; doi:10.1038/ncomms16042), 2017-07-03
Supplement: ncomms16042-s1.pdf [file ncomms16042-s1.pdf]

Type of file: PDF

Size of file: 0 KB

Title of file for HTML: Peer Review File

Description:
